# Supplementary material for: A new tool for photoaffinity labeling studies: a partially constrained, benzophenone based, α-amino acid
Source: Royal Society of Chemistry journal article supplement (doi:10.1039/c003943h), 2010-01-01

## ELECTRONIC SUPPORTING INFORMATION

### A New Tool for Photoaffinity Labeling Studies: a Conformationally Rigidified, Benzophenone Based, $\alpha$ -Amino Acid

Karen Wright, Alessandro Moretto, Marco Crisma, Michel Wakselman, Jean-Paul  
Mazaleyrat, Fernando Formaggio, and Claudio Toniolo

|                                                                                       |     |
|---------------------------------------------------------------------------------------|-----|
| TLC of Z-( <i>RS</i> )-BpAib-( <i>S</i> )-Phe-NHChx separation.....                   | S1  |
| $^1\text{H}$ and $^{13}\text{C}$ NMR spectra.....                                     | S2  |
| X-Ray diffraction data of Z-( <i>R</i> )-BpAib-( <i>S</i> )-Phe-NHChx <b>8a</b> ..... | S11 |
| Mass spectrum of the photoreaction products.....                                      | S12 |

*TLC*

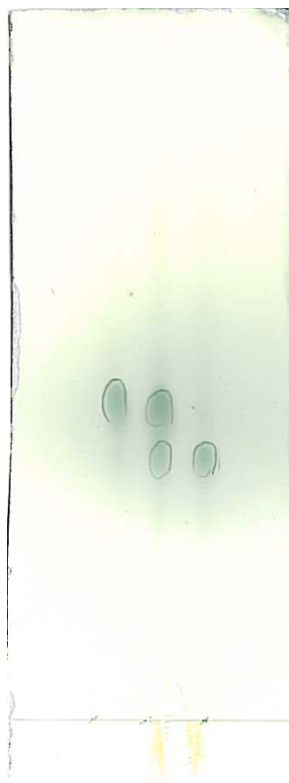

TLC of Z-(*RS*)-BpAib-(*S*)-Phe-NHChx separation. (Kieselgel F 254, Merck).  
Eluent : Cyclohexane : Ethyl acetate 1 : 1.  
Left lane : Z-(*S*)-BpAib-(*S*)-Phe-NHChx **7a** Rf 0.45  
Middle lane : Z-(*RS*)-BpAib-(*S*)-Phe-NHChx (artificial mixture)  
Right lane : Z-(*R*)-BpAib-(*S*)-Phe-NHChx **8a** Rf 0.37

*<sup>1</sup>H and <sup>13</sup>C NMR spectra*

3,4-*bis*-(bromomethyl)benzophenone **3**

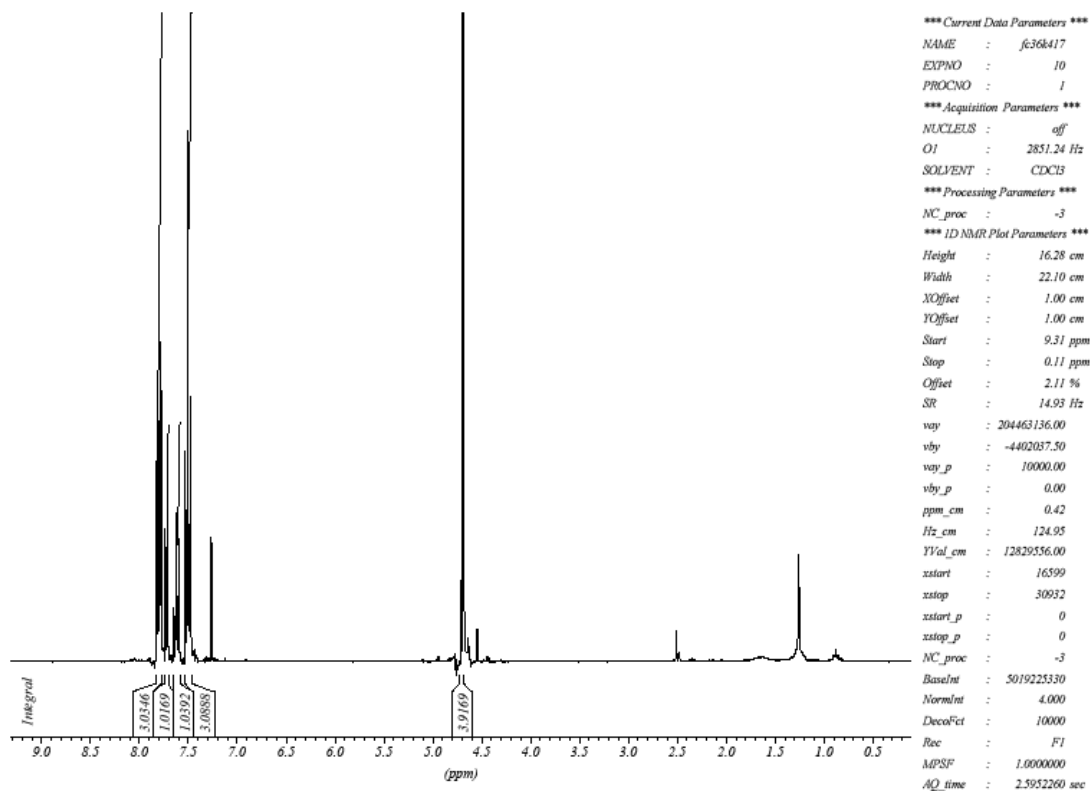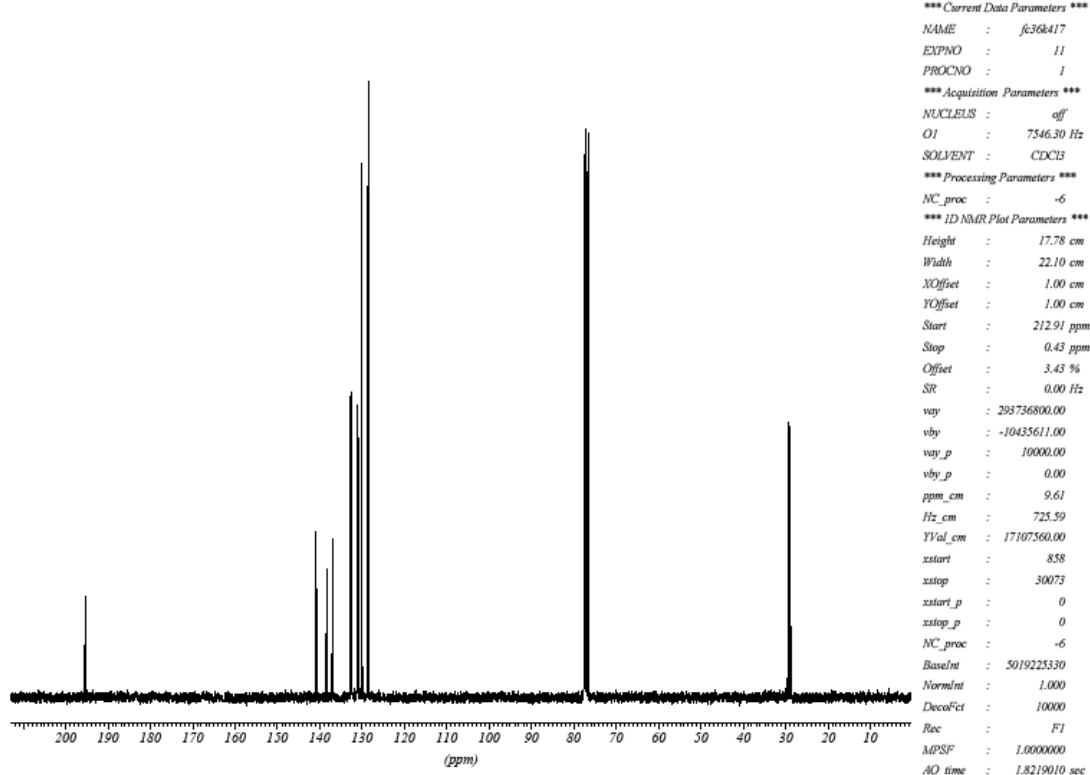

### H-(RS)-BpAib-OEt 4

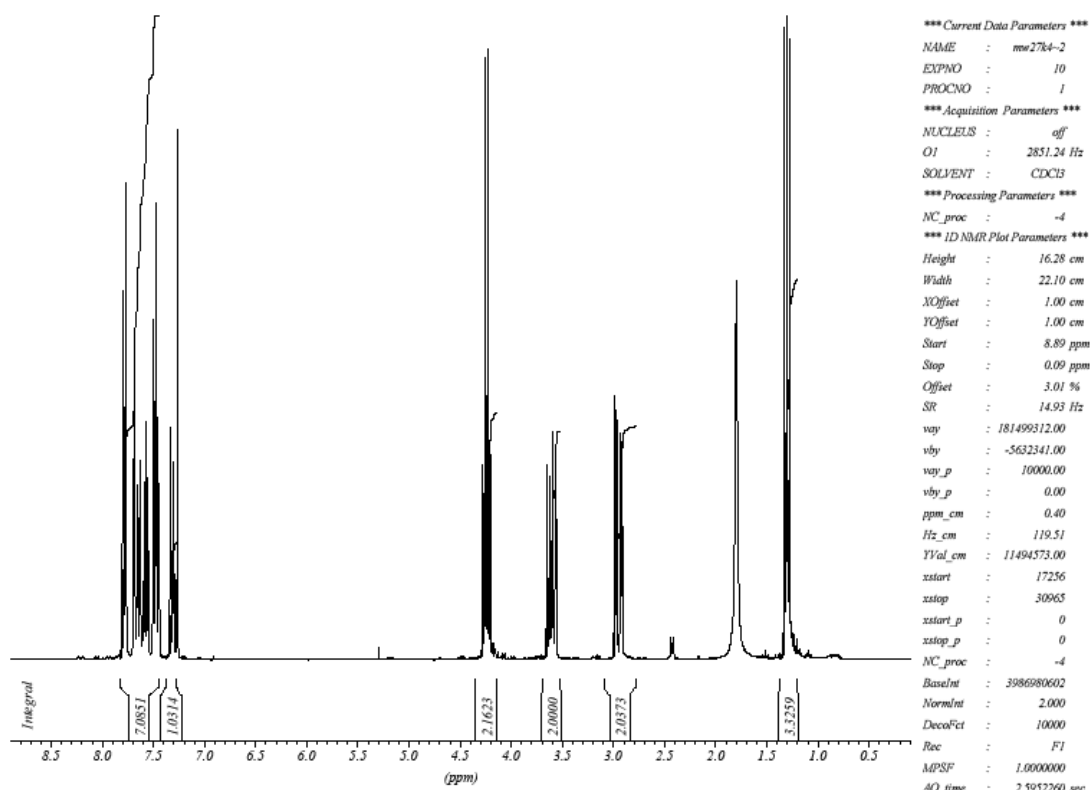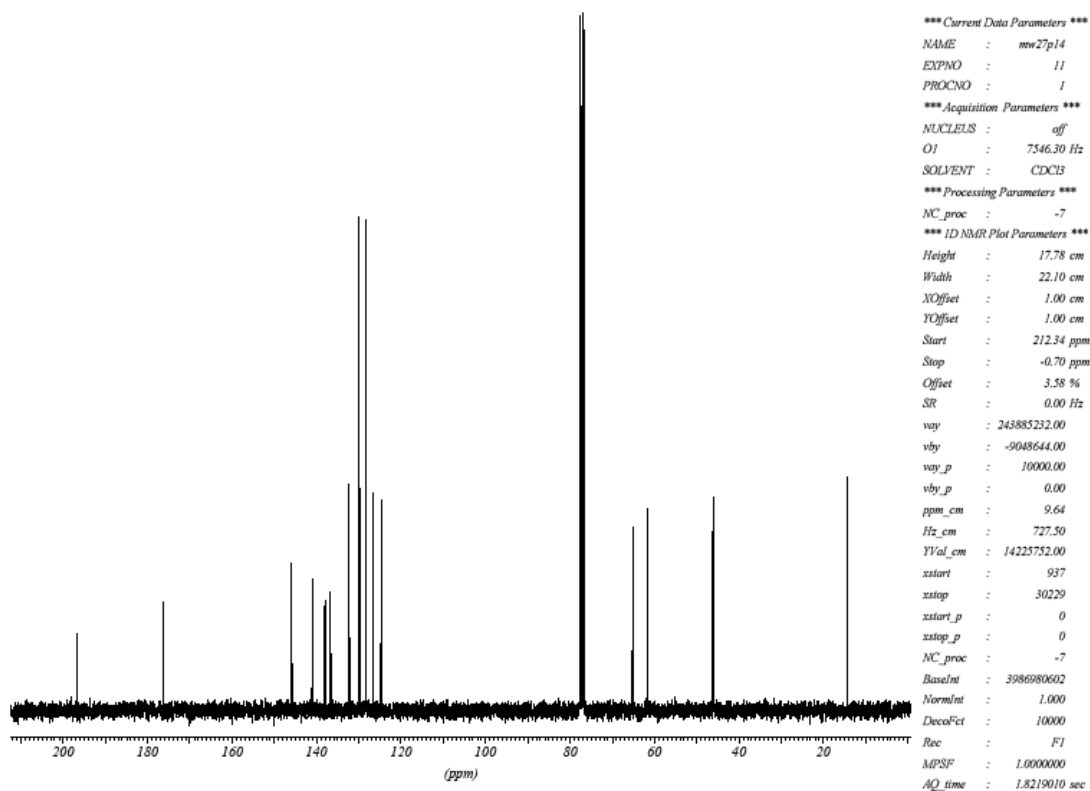

### Z-(RS)-BpAib-OH 5

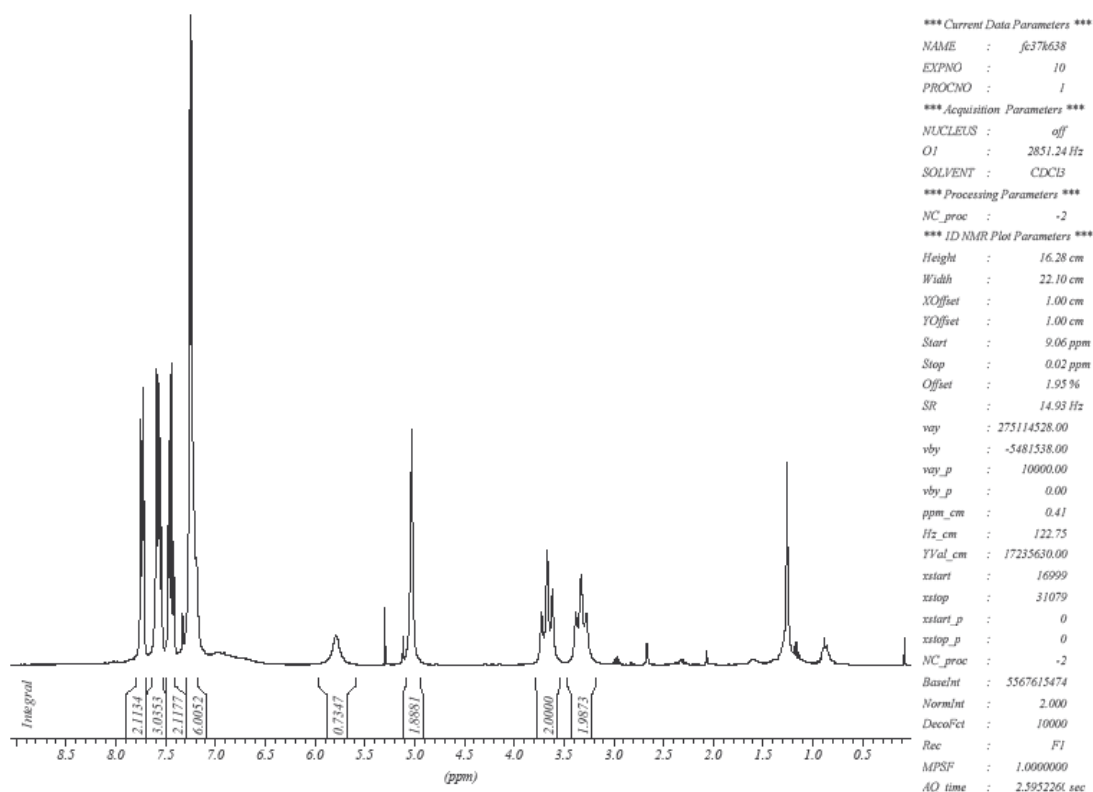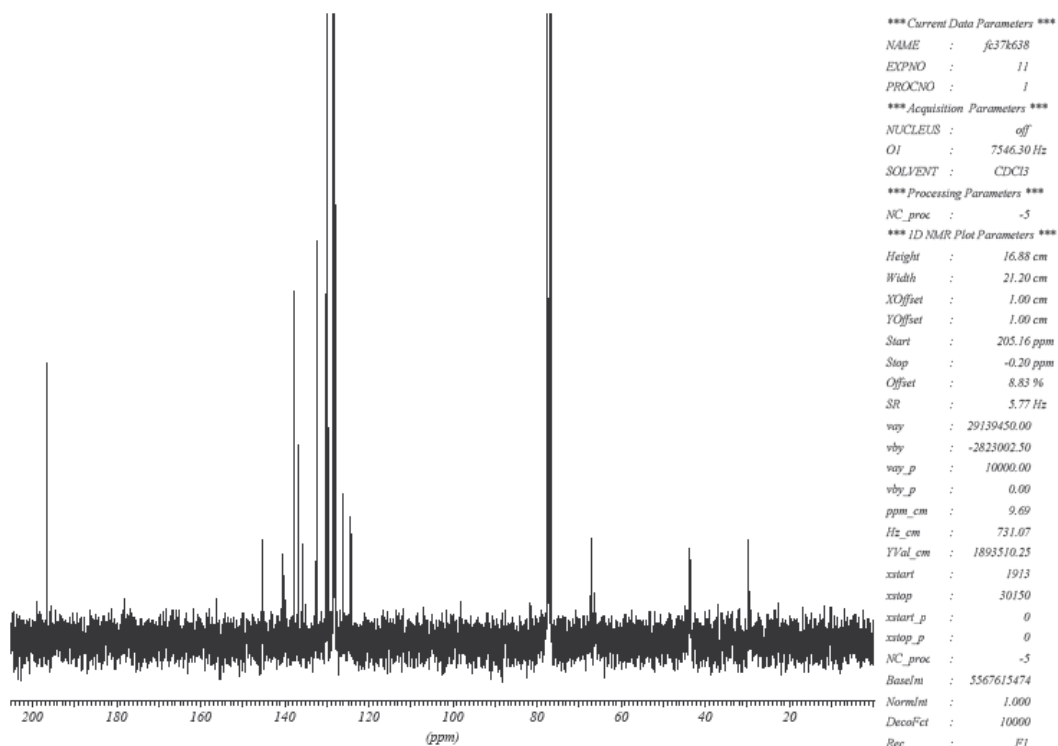

Z-(S)-BpAib-(S)-Phe-NHChx **7a**

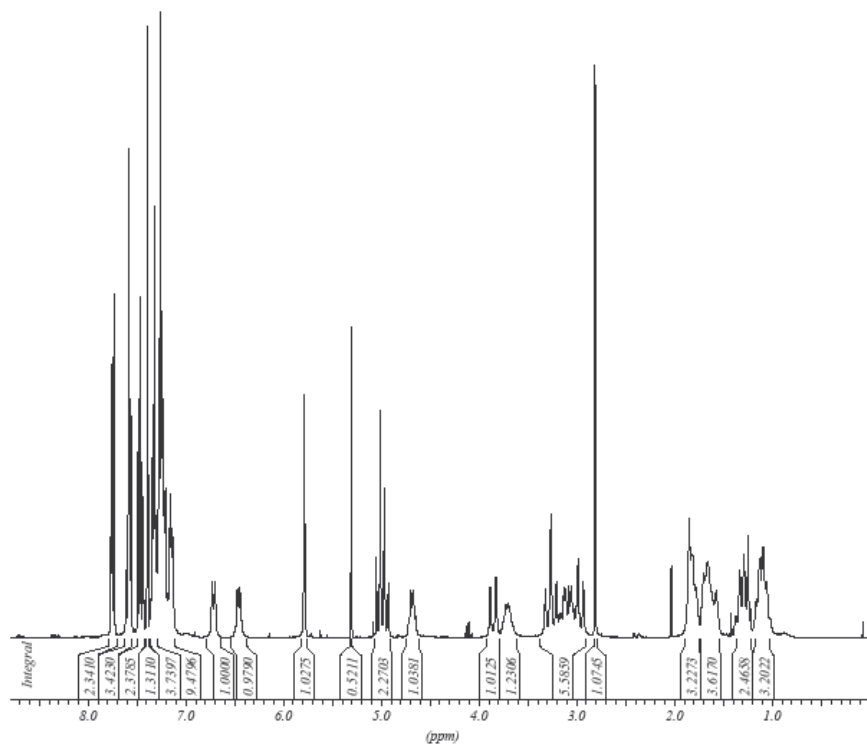

```

*** Current Data Parameters ***
NAME      : fc37k6-1
EXPNO    : 10
PROCNO   : 1
*** Acquisition Parameters ***
NUCLEUS  : off
OI       : 2851.24 Hz
SOLVENT  : CDCl3
*** Processing Parameters ***
NC_proc  : -2
*** 1D NMR Plot Parameters ***
Height   : 15.38 cm
Width    : 21.20 cm
XOffset  : 1.00 cm
YOffset  : 1.00 cm
Start    : 8.79 ppm
Stop     : -0.04 ppm
Offset   : 0.07 %
SR       : 14.93 Hz
vay      : 261617952.00
vby      : -170213.38
vay_p    : 10000.00
vby_p    : 0.00
ppm_cm   : 0.42
Hz_cm    : 125.01
YVal_cm  : 17021338.00
xstart   : 17412
xstop    : 31168
xstart_p : 0
xstop_p  : 0
NC_proc  : -2
Baselin  : 1657608492
NormInt  : 1.000
DecoFct  : 10000
Rec      : F1
    
```

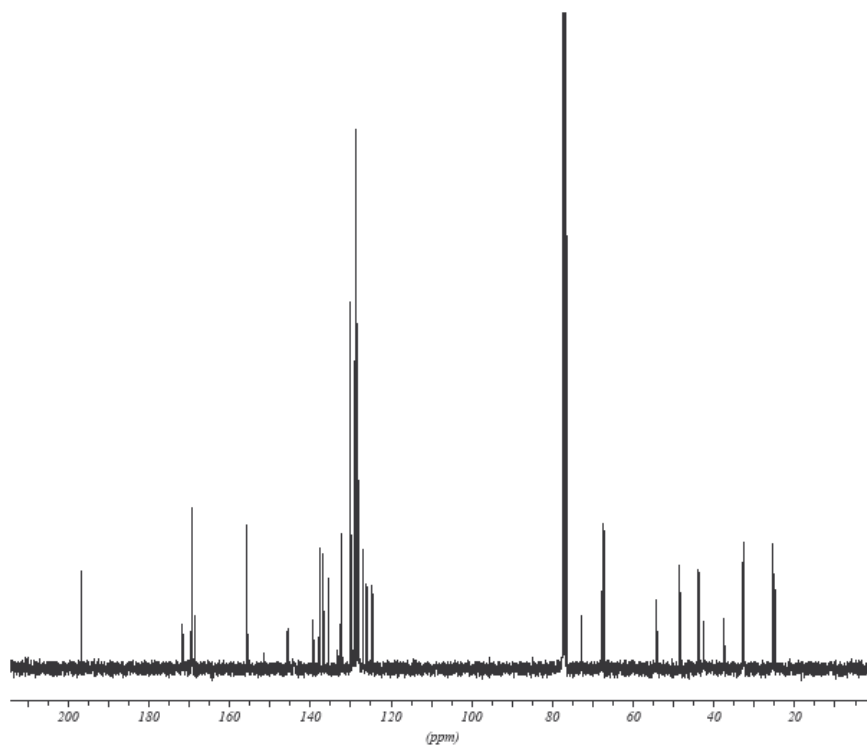

```

*** Current Data Parameters ***
NAME      : fc37k6-1
EXPNO    : 11
PROCNO   : 1
*** Acquisition Parameters ***
NUCLEUS  : off
OI       : 7546.30 Hz
SOLVENT  : CDCl3
*** Processing Parameters ***
NC_proc  : -6
*** 1D NMR Plot Parameters ***
Height   : 16.88 cm
Width    : 21.20 cm
XOffset  : 1.00 cm
YOffset  : 1.00 cm
Start    : 214.23 ppm
Stop     : 0.34 ppm
Offset   : 4.66 %
SR       : 7.97 Hz
vay      : 217564720.00
vby      : -10628756.00
vay_p    : 10000.00
vby_p    : 0.00
ppm_cm   : 10.09
Hz_cm    : 761.41
YVal_cm  : 13518571.00
xstart   : 663
xstop    : 30072
xstart_p : 0
xstop_p  : 0
NC_proc  : -6
Baselin  : 1657608492
NormInt  : 1.000
DecoFct  : 10000
Rec      : F1
    
```

Z-(R)-BpAib-(S)-Phe-NHChx **8a**

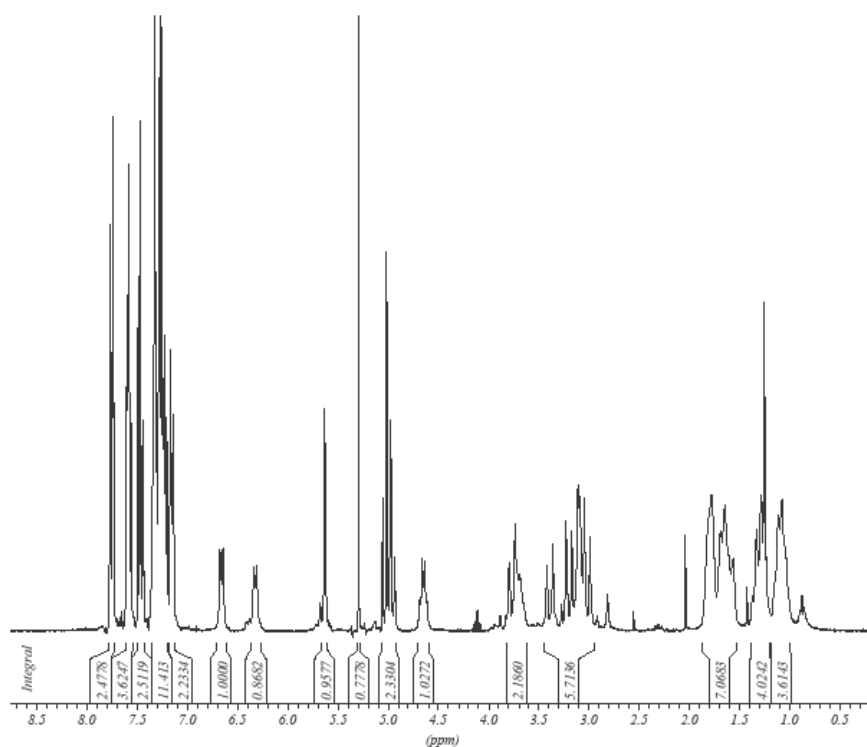

```

*** Current Data Parameters ***
NAME      : fc37k6-2
EXPNO    : 10
PROCNO   : 1
*** Acquisition Parameters ***
NUCLEUS  : off
OI       : 2851.24 Hz
SOLVENT  : CDCl3
*** Processing Parameters ***
NC_proc  : -5
*** 1D NMR Plot Parameters ***
Height   : 15.38 cm
Width    : 21.20 cm
XOffset  : 1.00 cm
YOffset  : 1.00 cm
Start    : 8.76 ppm
Stop     : 0.16 ppm
Offset   : 1.89 %
SR       : 15.12 Hz
vay      : 287711776.00
vby      : -5529252.00
vay_p    : 10000.00
vby_p    : 0.00
ppm_cm   : 0.41
Hz_cm    : 121.75
YVal_cm  : 19066386.00
xstart   : 17458
xstop    : 30855
xstart_p : 0
xstop_p  : 0
NC_proc  : -5
BaseInt  : 2704222900
NormInt  : 1.000
DecoFct  : 10000
Rec      : F1
    
```

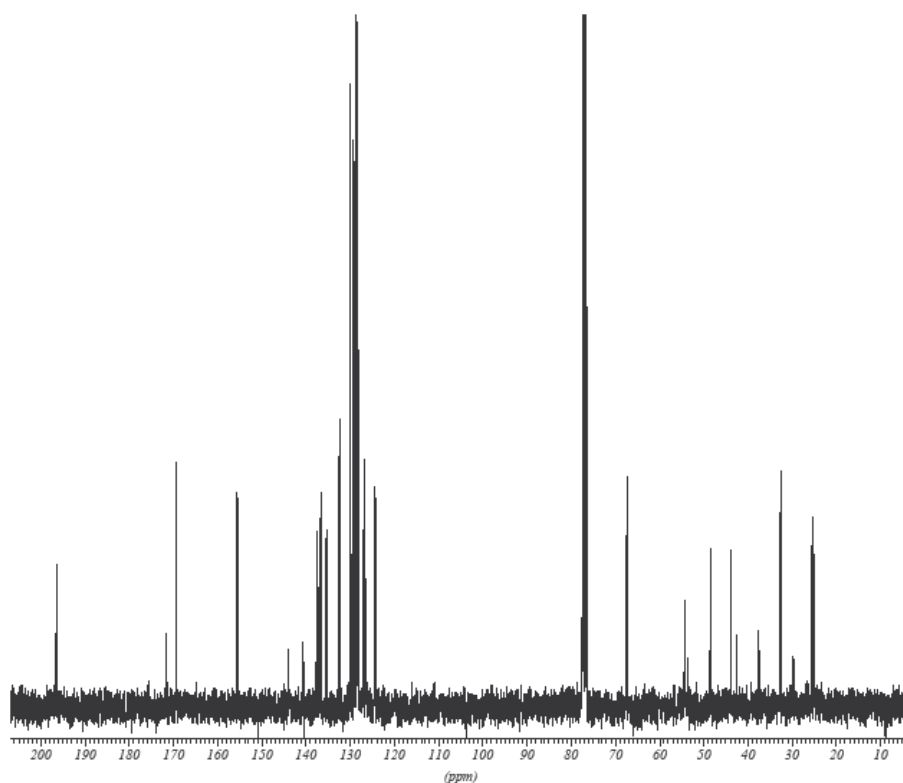

```

*** Current Data Parameters ***
NAME      : fc37k6-2
EXPNO    : 11
PROCNO   : 1
*** Acquisition Parameters ***
NUCLEUS  : off
OI       : 7546.30 Hz
SOLVENT  : CDCl3
*** Processing Parameters ***
NC_proc  : -6
*** 1D NMR Plot Parameters ***
Height   : 17.78 cm
Width    : 22.10 cm
XOffset  : 1.00 cm
YOffset  : 1.00 cm
Start    : 206.85 ppm
Stop     : 3.18 ppm
Offset   : 4.55 %
SR       : 6.87 Hz
vay      : 92406576.00
vby      : -4406553.00
vay_p    : 10000.00
vby_p    : 0.00
ppm_cm   : 9.22
Hz_cm    : 695.51
YVal_cm  : 5445058.00
xstart   : 1679
xstop    : 29683
xstart_p : 0
xstop_p  : 0
NC_proc  : -6
BaseInt  : 2704222900
NormInt  : 1.000
DecoFct  : 10000
Rec      : F1
MPSF    : 1.0000000
AQ_time  : 1.8219016 sec
    
```

Bz-(*RS*)-BpAib-OH 6

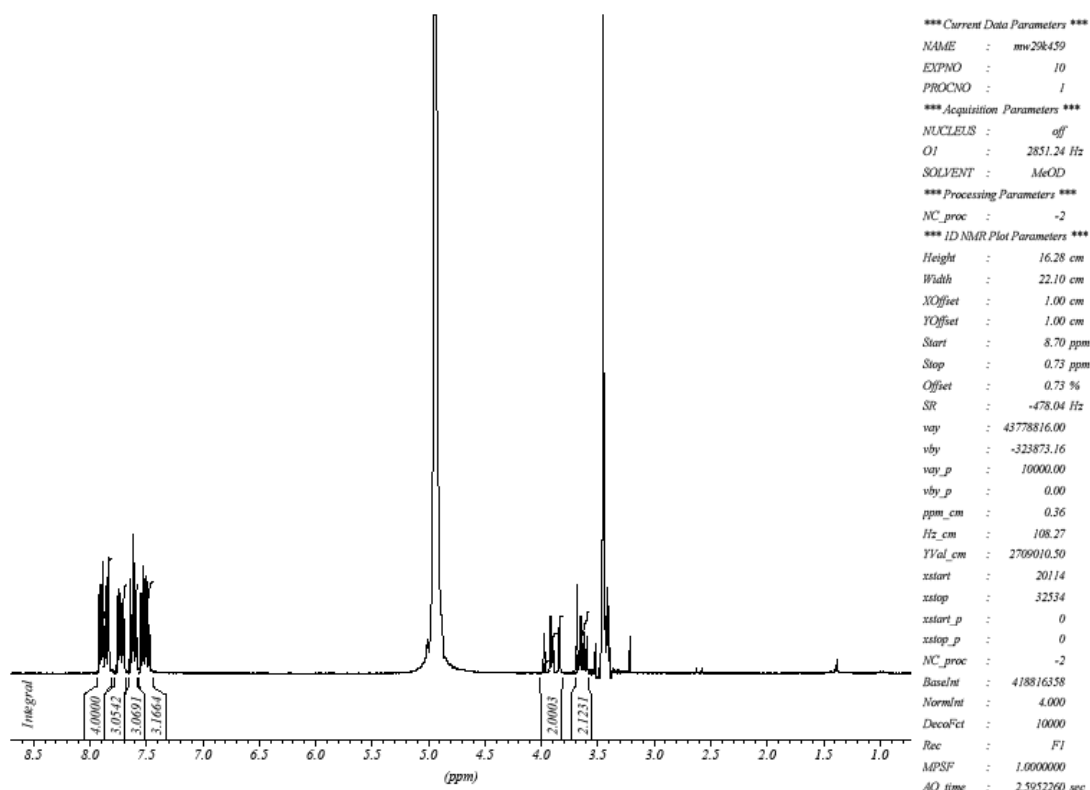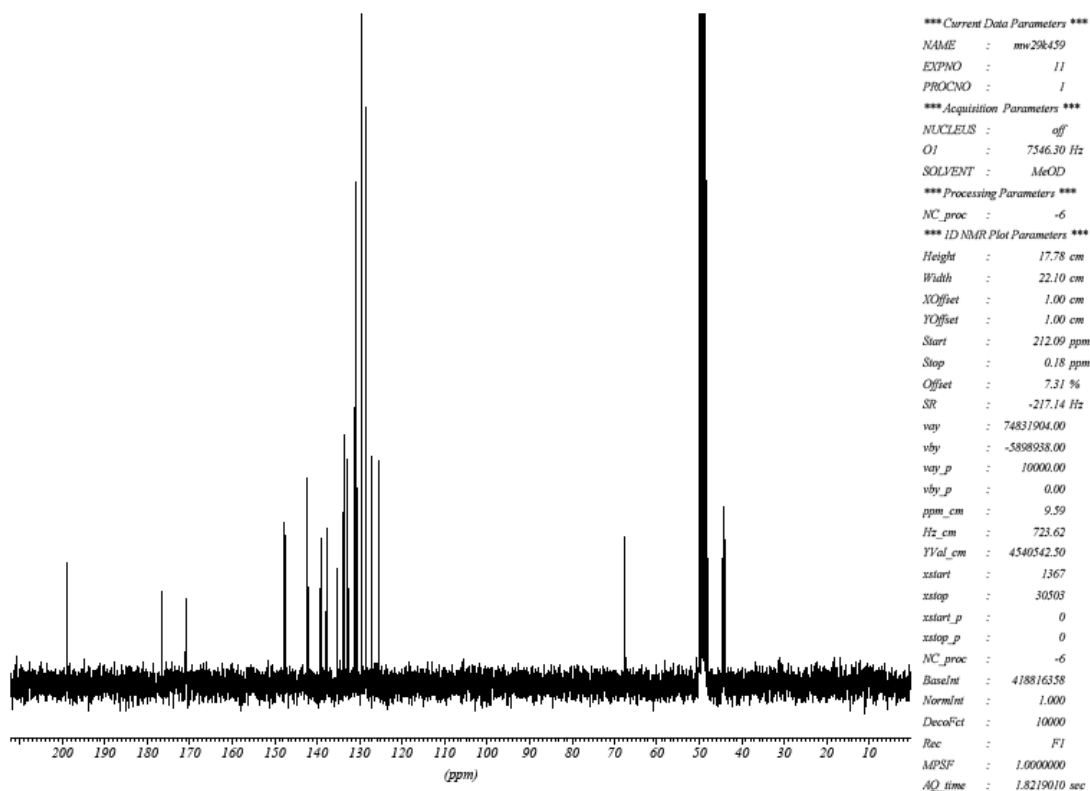



Bz-(S)-BpAib-(S)-Phe-NHChx **7b**

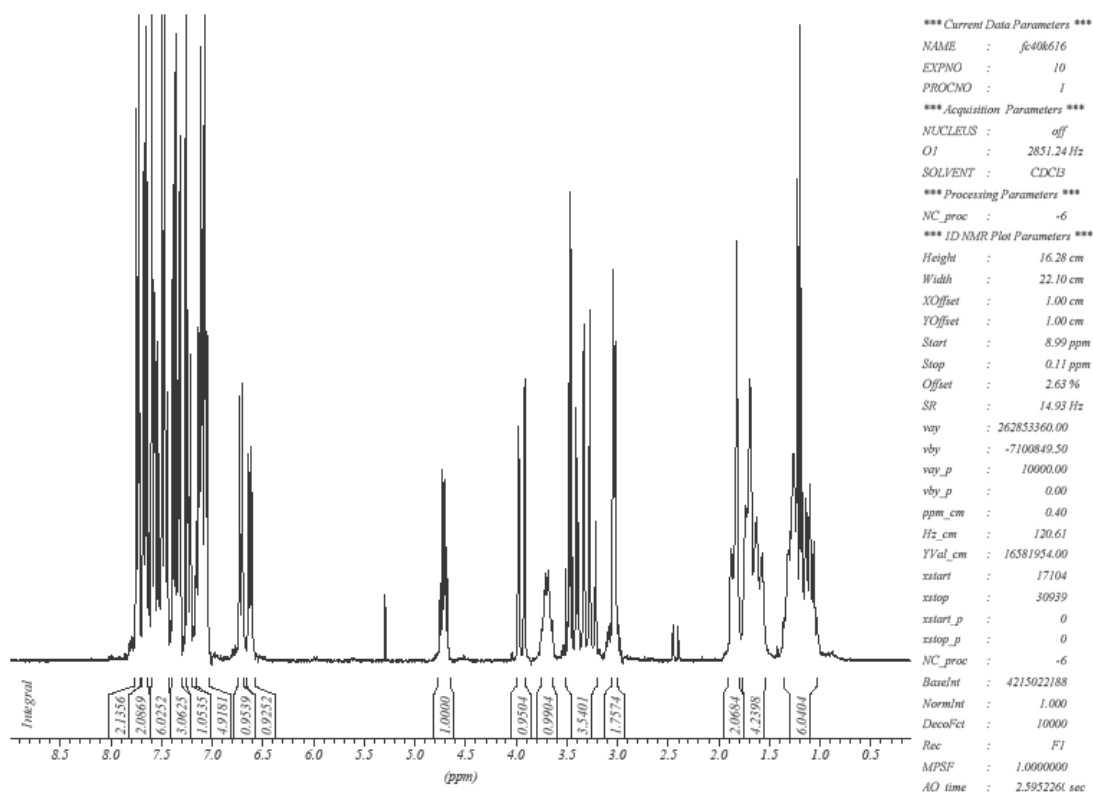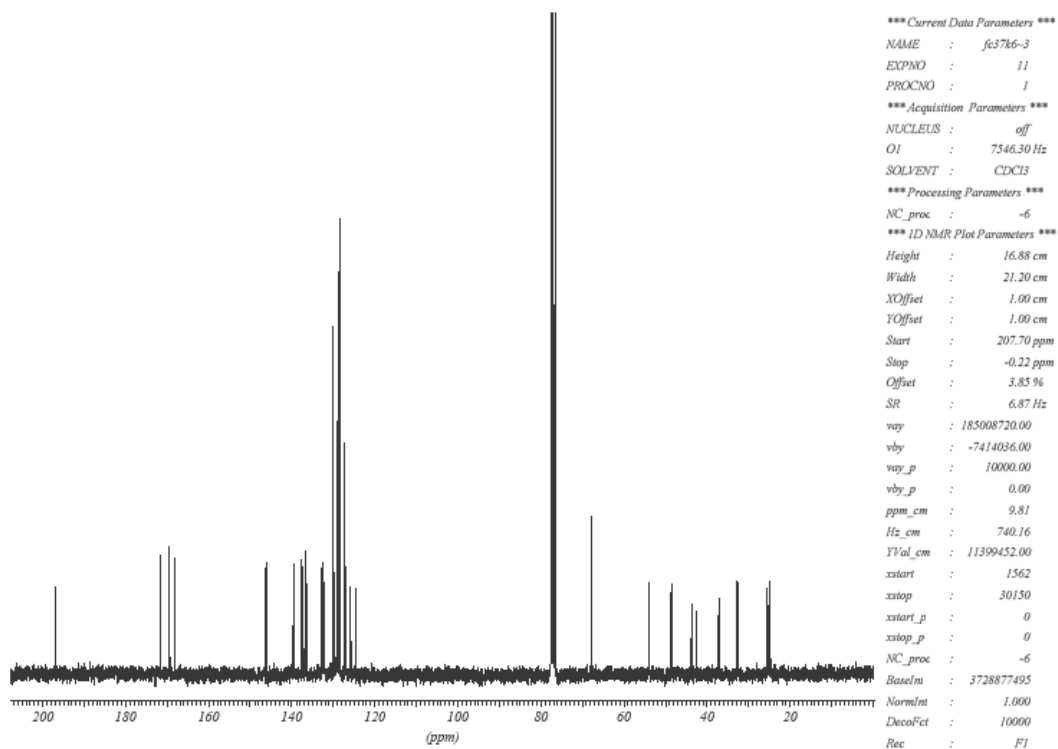

Bz-(R)-BpAib-(S)-Phe-NHChx **8b**

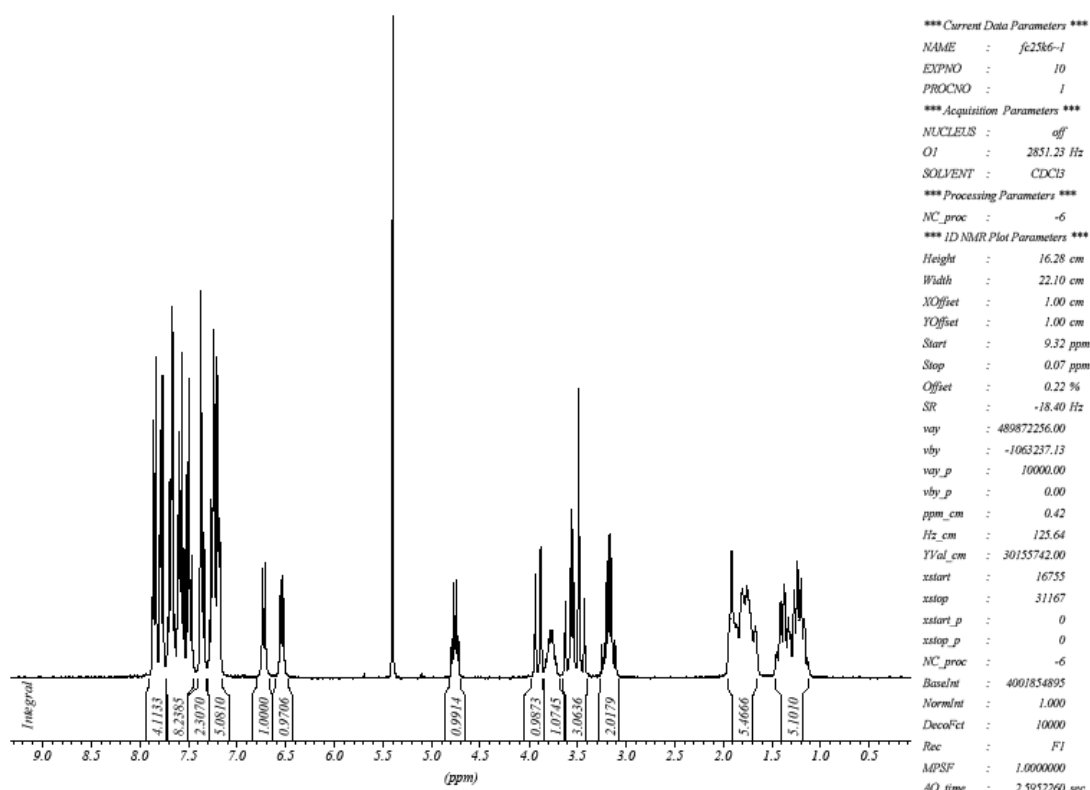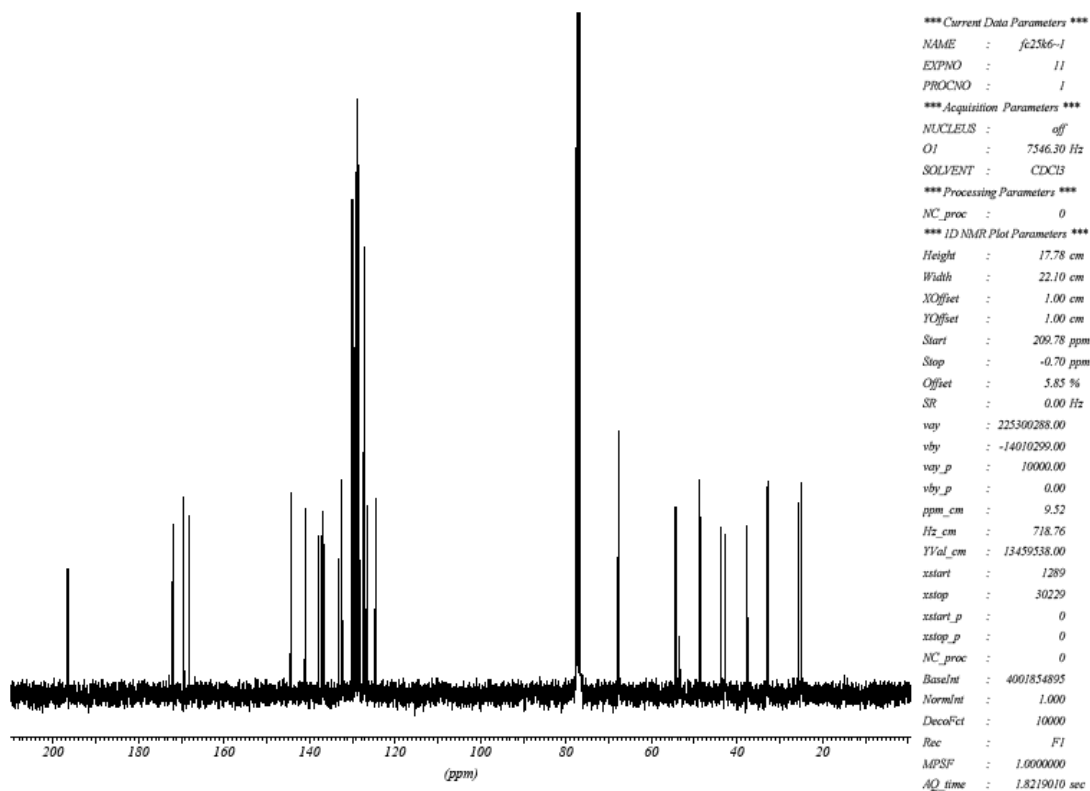

Boc-(S)-BpAib-OMe 9

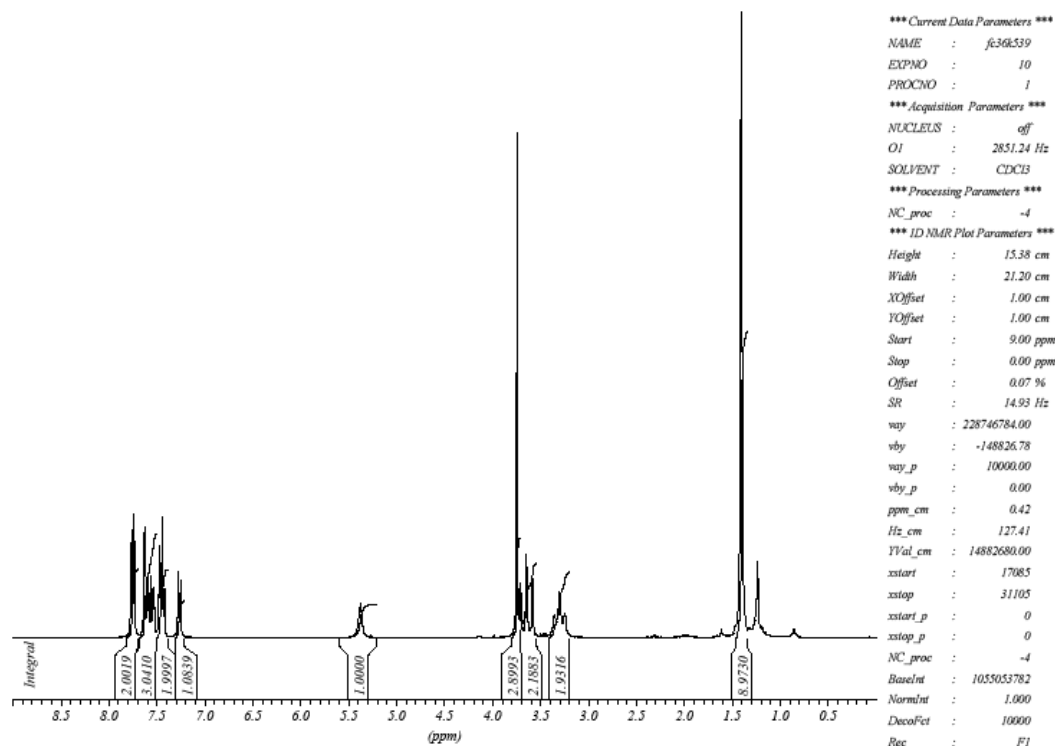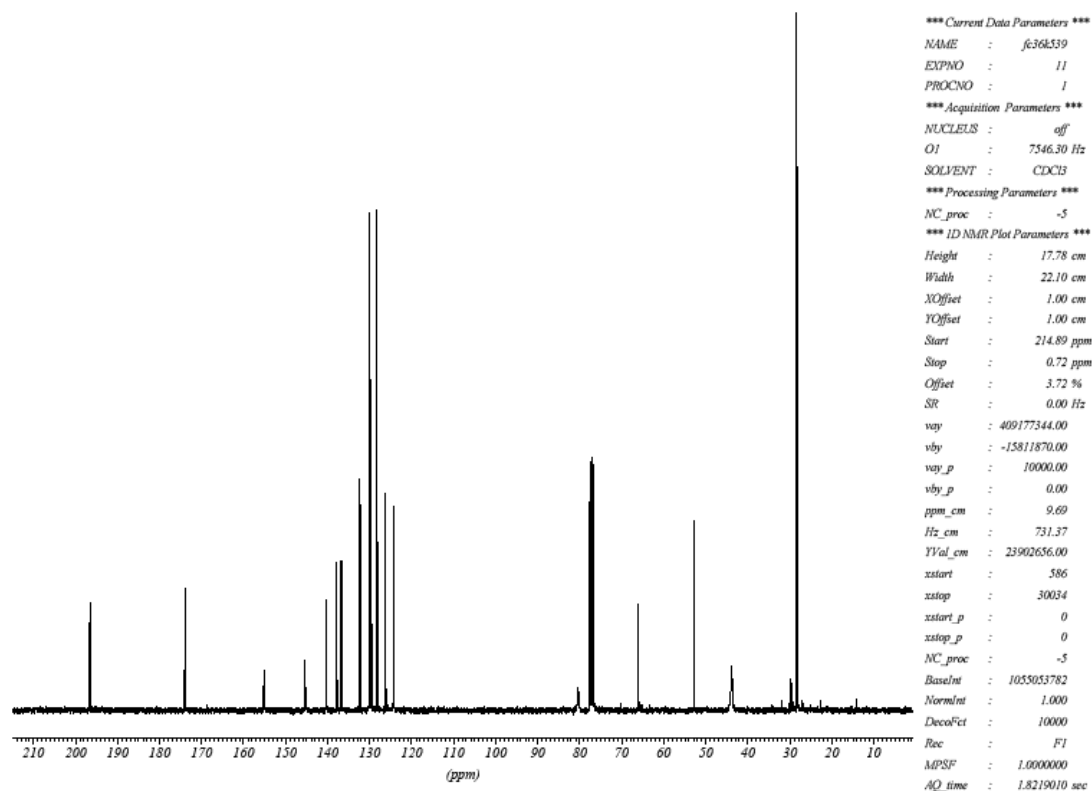

### *X-Ray diffraction data of 8a*

Single crystals of *Z-(R)*-BpAib-*(S)*-Phe-NHChx were grown by slow evaporation from a dichloromethane – methanol solution. Diffraction data were collected at  $T = 293(2)$  K with  $\text{CuK}\alpha$  radiation ( $\lambda = 1.54178$  Å) using a Philips PW 1100 diffractometer in the  $\theta - 2\theta$  scan mode up to  $\theta = 55^\circ$ . The crystal did not significantly diffract at higher resolution. Cell parameters were obtained by least-squares refinement of the angular settings of 48 carefully centered reflections in the  $12 - 18^\circ$   $\theta$  range. Three standard reflections, periodically monitored, showed an intensity decay that reached 15% at the end of data collection. Intensities were re-scaled accordingly. Intensities were corrected for Lorentz and polarization effects, but not for absorption. The structure was solved by direct methods with the SIR 2002 program [S1]. The asymmetric unit is composed of one peptide molecule and one co-crystallized dichloromethane molecule. Refinement was carried out by full-matrix block least-squares procedures on  $F^2$ , using all data, by application of the SHELXL 97 program [S2], and allowing the positional parameters and the anisotropic displacement parameters of the non-hydrogen atoms to refine at alternate cycles. All non-hydrogen atoms were refined anisotropically. A common population parameter for the atoms of the co-crystallized dichloromethane molecule refined to the value of 0.712(7). Hydrogen atoms were calculated at idealized positions and refined using a riding model.

Formula:  $\text{C}_{40}\text{H}_{41}\text{N}_3\text{O}_5 \times 0.71 \text{CH}_2\text{Cl}_2$ ; formula weight: 703.2; orthorhombic, space group  $\text{P}2_12_12_1$ ; unit cell parameters:  $a = 10.949(3)$ ,  $b = 14.354(3)$ ,  $c = 24.633(5)$  Å;  $V = 3871.4(15)$  Å<sup>3</sup>;  $Z = 4$ ;  $D_{\text{calcd}} = 1.207$  Mg m<sup>-3</sup>; crystal size:  $0.50 \times 0.20 \times 0.10$  mm<sup>3</sup>; 3104 reflections collected, of which 3061 independent ( $R_{\text{int}} = 0.045$ ); index ranges:  $-1 \leq h \leq 11$ ,  $0 \leq k \leq 15$ ,  $0 \leq l \leq 26$ ; data / parameters: 3061/414;  $R_1 = 0.0678$  [on  $F \geq 4\sigma(F)$ ];  $wR_2 = 0.2070$  (on  $F^2$ , all data); goodness of fit on  $F^2$ : 1.019; Flack parameter 0.95(7); largest peak and hole in the final difference Fourier map: 0.413 and  $-0.222$  e Å<sup>-3</sup>.

Crystallographic data (including atomic coordinates, bond distances, bond angles, torsion angles, intra- and intermolecular H-bonds parameters) have been deposited at The Cambridge Crystallographic Data Centre with deposition number CCDC-746110, and may be found in the Supporting Information as a CIF file.

#### *Supporting references*

[S1] Burla, M. C.; Camalli, M.; Carrozzini, B.; Cascarano, G. L.; Giacovazzo, C.; Polidori, G.; Spagna, R. *J. Appl. Crystallogr.* **2003**, *36*, 1103.

[S2] Sheldrick, G. M. *Acta Crystallogr.* **2008**, *A64*, 112-122.

Mass spectrum of the mixture of the two diastereomeric products (**11A** and **11B**) isolated after the photoreaction.

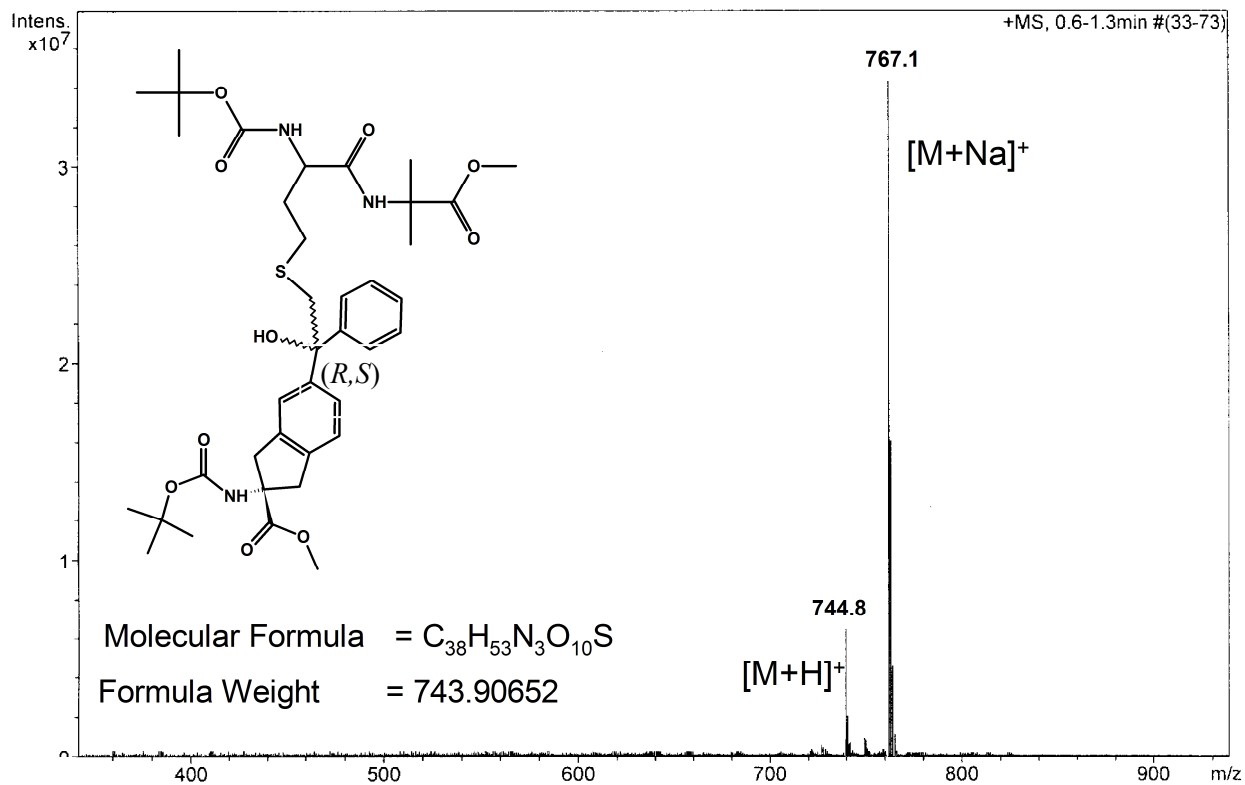

Supplement: c003943h.pdf [file c003943h.pdf]
